# Supplementary material for: Post-synthetic modification of an amino-functionalized metal–organic framework for highly efficient enrichment of N-linked glycopeptides
Source: Royal Society of Chemistry journal article supplement (doi:10.1039/c6nr02490d), 2016-01-01
Supplement: c6nr02490d1.pdf [file c6nr02490d1.pdf]

## Supporting Information

### Post synthetic modification of amino-functionalized metal-organic framework for the efficient enrichment of N-linked glycopeptides

Wen Ma,<sup>a</sup> Linnan Xu,<sup>a</sup> Ze Li,<sup>a</sup> Yunlong Sun,<sup>b</sup> Yu Bai<sup>\*a</sup> and Huwei Liu <sup>a</sup>

*<sup>a</sup>Beijing National Laboratory for Molecular Sciences, Key Laboratory of Bioorganic Chemistry and Molecular Engineering of Ministry of Education, College of Chemistry and Molecular Engineering, Institute of Analytical Chemistry, Peking University, Beijing 100871, China.*

*<sup>b</sup>Center for Soft Matter Science and Engineering, Peking University, Beijing, 100871*

*\*Tel: +86 10 6275 8198; E-mail: [yu.bai@pku.edu.cn](mailto:yu.bai@pku.edu.cn)*

## Experimental Section

### Chemicals and Materials

Trypsin, horseradish peroxidase (HRP), human serum immunoglobulin G (human IgG), azidotrimethylsilane (TMSN<sub>3</sub>), acetonitrile (ACN) were purchased from Sigma-Aldrich. Amberlite IR-120 resin (H<sup>+</sup> form), tert-butyl nitrate (tBuONO), 2,5-dihydroxybenzoic acid (DHB), dithiothreitol (DTT) and iodoacetamide (IAA) were purchased from J&K Scientific Ltd. Tetrahydrofuran (THF), anhydrous potassium carbonate, copper(II) sulfate (CuSO<sub>4</sub>·5H<sub>2</sub>O) and urea were from Xilong Chemical Co., Ltd. Ammonium bicarbonate (NH<sub>4</sub>HCO<sub>3</sub>) was from Fluka. Ethanol and phosphoric acid (H<sub>3</sub>PO<sub>4</sub>) were from Beijing Chemical Works. Chromic nitrate hydrate, sodium methoxide and boron trifluoride/ether were from Sinopharm Chemical Reagent Co., Ltd. 2-aminoterephthalic acid was from AlfaAesar China Chemical Co., Ltd. Anhydrous methanol and dichloromethane (CH<sub>2</sub>Cl<sub>2</sub>) were from Beijing Tong Guang Fine Chemicals Company. β-D-maltose octaacetate was purchased from Energy Chemical. Ascorbic acid was purchased from Aladdin Industrial Inc. Trifluoroacetic acid (TFA) was obtained from Acros Organics. Peptide-N-glycosidase (PNGase F) was from New England Biolabs (Ipswich, MA, USA). Water used for digestion and enrichment analysis was from Wahaha Group Co., Ltd. All chemicals were of analytical grade except ACN, which were of HPLC grade. Human serum of a healthy person was

obtained from Peking University Hospital.

### **Preparation of MIL-101(Cr)-maltose**

#### Preparation of parent MIL-101(Cr)-NH<sub>2</sub>

MIL-101(Cr)-NH<sub>2</sub> was synthesized according to a previous report<sup>S1</sup>. Briefly, 1500mg chromic nitrate hydrate and 690mg 2-aminoterephthalic acid were dispersed in 21mL deionized water in a 30mL Teflon-lined stainless steel autoclave, the reaction was conducted at 130°C for 24h. The product was then washed by ethanol for several times and dried in vacuum.

#### Preparation of MIL-101(Cr)-N<sub>3</sub>

The post synthetic modification of MIL-101(Cr)-NH<sub>2</sub> was conducted according to a generic post functionalization method<sup>S2</sup> starting from amino-derived metal-organic frameworks. The freshly prepared MIL-101(Cr)-NH<sub>2</sub> (80mg) was treated with tBuONO (0.3mL) and TMSN<sub>3</sub> (0.27mL) in THF for 20min at room temperature. The resulting compound was washed three times by THF and three times by CH<sub>2</sub>Cl<sub>2</sub>.

#### Preparation of 1-propargyl-O-maltose

1-propargyl-O-maltose was synthesized according to a reported method<sup>S3</sup>. In detail, under nitrogen atmosphere, 25.0g β-D-maltose octaacetate was dissolved in 350mL CH<sub>2</sub>Cl<sub>2</sub> in a dried flask, then 2.5mL propargyl alcohol was added. The suspension was stirred at 0°C for 1h after the addition of 7.5mL boron trifluoride/ether and at room temperature for another 4h. After 12.5g anhydrous potassium carbonate was added, the solution continuously stirred for 30min. The unreacted solid was filtered out and the filtrate was concentrated. 1-propargyl-acetyl-maltose was obtained with m/z=697.0 ([M+Na]<sup>+</sup>) by MALDI-TOF MS. The obtained solid was further dissolved in 750mL anhydrous methanol solution. Then, 250mL sodium methoxide in methanol (1 M) was added dropwise. The reaction was conducted at room temperature for 6h, and the resulting solution was neutralized by Amberlite IR-120 resin (H<sup>+</sup> form). The solution was then filtered out and the filtrate was concentrated. 1-propargyl-O-maltose was obtained with m/z=402.6 ([M+Na]<sup>+</sup>) by MALDI-TOF MS.

#### Preparation of MIL-101(Cr)-maltose

The obtained MIL-101(Cr)-N<sub>3</sub> (170mg) and an excess of 1-propargyl-O-maltose was

dispersed in 40mL methanol/water(v/v=1:1) solution in a 100mL flask and sonicated for 20min. Then 2mL solution containing 138mg  $\text{CuSO}_4 \cdot 5\text{H}_2\text{O}$  and 323 mg ascorbic acid was added. The mixture continuously stirred for 72 h at 40 °C. The obtained solid was washed by water, methanol, ethanol nine times and dried in the vacuum oven.

### **Characterization**

Fourier-transformed infrared spectroscopy (FT-IR) characterization was measured with KBr pellet by Bruker Tensor 27 FT-IR. Transmittance spectrum was acquired with resolution of 4  $\text{cm}^{-1}$  and average spectrum of 32-time measurements was recorded.  $^1\text{H}$ -NMR spectra were recorded on a Bruker ARX400 FT-NMR spectrometer (at 400 MHz). All samples were digested in  $\text{NaOD}/\text{D}_2\text{O}$ . Power X-ray diffraction pattern was carried out on a Bruker D2 diffractometer with  $\text{Cu K}\alpha$  radiation ( $\lambda=1.5406\text{\AA}$ ) at an accelerating potential of 40kV and a scanning speed of  $2^\circ \text{ min}^{-1}$ . For transmission electron microscopy (TEM) characterization, the NPs were collected on carbon-coated copper grids. TEM images were recorded on a JEOL JEM-2100 at 200kV.  $\text{N}_2$  adsorption-desorption experiment was conducted in ASAP 2020M apparatus. MIL-101(Cr)- $\text{NH}_2$  was degassed at  $120^\circ\text{C}$  and MIL-101(Cr)- $\text{N}_3$ , MIL-101(Cr)-maltose were degassed at  $100^\circ\text{C}$  in case of decomposition. The BET surface area was calculated over the range of relative pressures between 0.05 and 0.20. It revealed that the surface area were  $2357.4 \text{ m}^2 \text{ g}^{-1}$ ,  $1518.6 \text{ m}^2 \text{ g}^{-1}$  and  $250.2 \text{ m}^2 \text{ g}^{-1}$  for MIL-101(Cr)- $\text{NH}_2$ , MIL-101(Cr)- $\text{N}_3$ , and MIL-101(Cr)-maltose, respectively.

### **Tryptic digest of glycoproteins**

2mg HRP or IgG was dissolved in 1mL solution containing 50mM  $\text{NH}_4\text{HCO}_3$  and 8M urea. After that, proteins were reduced with 20 $\mu\text{L}$  DTT (1M) at  $60^\circ\text{C}$  for 1 h and alkylated by 7.4 mg IAA at  $37^\circ\text{C}$  in the dark for 45 min. Then, the solution was diluted ten-fold with 50mM  $\text{NH}_4\text{HCO}_3$ , followed by the addition of trypsin at enzyme-protein ratio of 1: 20 (w/w). The solution was incubated at  $37^\circ\text{C}$  for 18h, and the tryptic digests were stored at  $-20^\circ\text{C}$  for further use. For human serum sample, the preparation was almost the same. In detail, 5 $\mu\text{L}$  human serum was diluted by 40 $\mu\text{L}$  denaturing solution containing 50mM  $\text{NH}_4\text{HCO}_3$  and 8M urea. Then, the sample was reduced with 5  $\mu\text{L}$  DTT (200 mM) at  $60^\circ\text{C}$  for 1 h and alkylated by 7.2

mg IAA at 37°C in the dark for 45 min. The resulting solution was diluted by 350 µL 50 mM  $\text{NH}_4\text{HCO}_3$  and digested with trypsin (protein: enzyme = 20:1, w/w) for 20 h. The peptide mixture was lyophilized and kept at -20°C for further use.

#### **Enrichment of glycopeptides in standard glycoprotein and human serum sample**

20 µg MIL-101(Cr)-maltose was suspended in 150 µL loading buffer containing ACN/H<sub>2</sub>O/TFA (88:7:5, v/v/v). Then 10 µL tryptic digest HRP (2 µg) or 15 µL human IgG (3 µg) was added and the solution was incubated for 30 min. After washed by loading buffer three times to remove non-glycopeptides, the adsorbed glycopeptides were eluted with elution buffer containing ACN/H<sub>2</sub>O/TFA (30:69.9:0.1, v/v/v). The collected peptides were analyzed by MALDI-TOF MS. For human serum sample, peptides were redissolved in 200 µL ACN/H<sub>2</sub>O/TFA (88:7:5, v/v/v), then 200 µg MIL-101(Cr)-maltose was added. The enrichment was gently carried out for 30 min, then washed by loading buffer for three times. The glycopeptides were eluted with 2 × 30 µL elution buffer and lyophilized. The collected peptides were deglycosylated for LC-MS/MS analysis.

#### **Deglycosylation of glycopeptides by PNGase F**

The lyophilized glycopeptides were redissolved in 50 mM  $\text{NH}_4\text{HCO}_3$ , followed by addition of 1 µL PNGase F. The reaction was carried out at 37°C for 16 h. The resulting solution was further analyzed by MALDI-TOF MS or LC-MS/MS.

#### **Mass spectrometry analysis**

##### **MALDI-TOF MS analysis**

MALDI-TOF MS spectra were obtained by a Bruker Daltonics ultraflex TOF mass spectrometer in reflection mode. A mixture of 25 mg/mL DHB in ACN/H<sub>2</sub>O/H<sub>3</sub>PO<sub>4</sub> (70:29:1, v/v/v) was prepared as the matrix. For eluted glycopeptides, 0.5 µL elute was mixed with 0.5 µL matrix on the steel plate for MS analysis.

##### **LC-MS/MS Analysis**

All LC-MS/MS were performed on a Velos Pro Orbitrap Elite mass spectrometer (Thermo Scientific, USA) equipped with a nano-ESI source. The samples were vacuum-centrifuged to

dryness, reconstituted in 0.2% formic acid, loaded onto a pre-column and separated on a C18 column. For a gradient separation, 5-30% B in 121min, 30%-75% B in 4min, then held at 75% B for 20 min (A = 0.1% formic acid in water, B = 0.1% formic acid in acetonitrile). Full MS scan was obtained from  $m/z=375-1600$  at a resolution of 120000 followed by CID (Collision Induced Dissociation) MS/MS scans.

#### **Database search and data analysis**

All the raw data files were converted to mascot generic format before submitted for Mascot (version 2.3.02) database search. The search parameters were set as follows: fixed modification of cysteine residues (+57.0215 Da), variable modification of methionine oxidation (+15.9949 Da) and deamidation (+0.9840 Da). The mass tolerances were 5 ppm for initial precursor ions and 0.5 Da for fragment ions. Two missed cleavages were allowed for trypsin restriction. Only glycopeptides with N-!P-S/T were considered as highly reliable results.

#### **Reference:**

S1.D. M. Jiang, L. L. Keenan, A. D. Burrows and K. J. Edler, *Chem. Commun.*, 2012, **48**, 12053-12055.

S2.M. Savonnet, D. Bazer-Bachi, N. Bats, J. Perez-Pellitero, E. Jeanneau, V. Lecocq, C. Pinel and D. Farrusseng, *J. Am. Chem. Soc.*, 2010, **132**, 4518-4519.

S3.Z. C. Xiong, L. Zhao, F. J. Wang, J. Zhu, H. Q. Qin, R. A. Wu, W. B. Zhang and H. F. Zou, *Chem. Commun.*, 2012, **48**, 8138-8140.

## Figures and Table

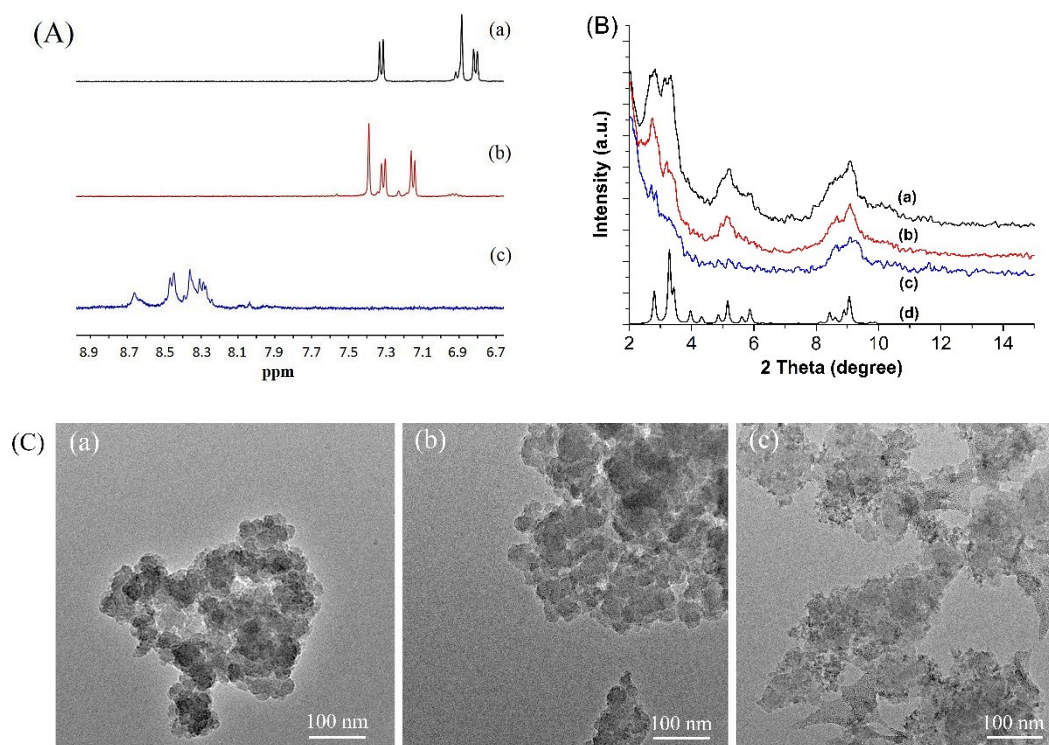

**Fig. S1** (A)  $^1\text{H}$ -NMR spectra, (B) PXRD pattern and (C) TEM image of (a) MIL-101(Cr)-NH<sub>2</sub>, (b) MIL-101(Cr)-N<sub>3</sub>, (c) MIL-101(Cr)-maltose and (d) the simulated PXRD pattern calculated from MIL-101(Cr) structure.

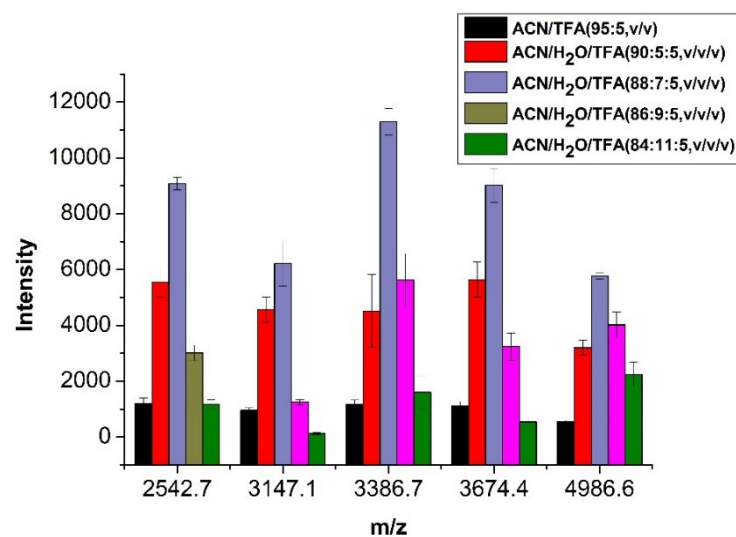

**Fig. S2** The effect of different acetonitrile concentration in loading buffer on intensity of five selected glycopeptides captured by MIL-101(Cr)-maltose from HRP digest.

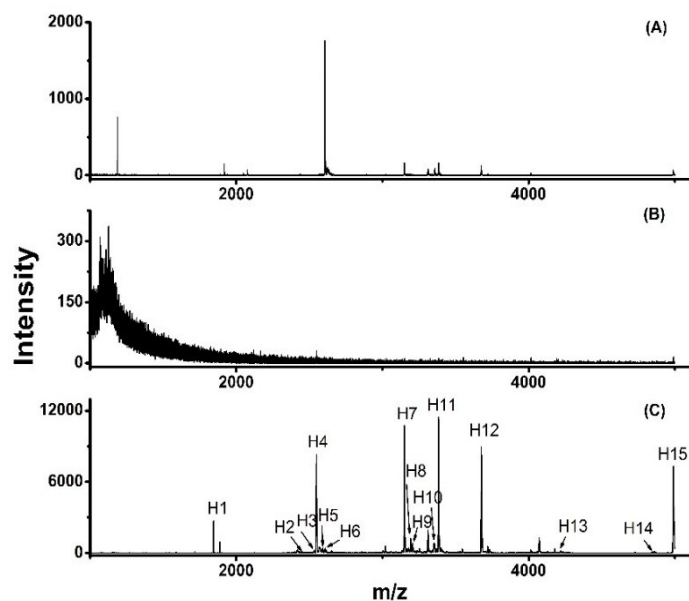

**Fig. S3** MALDI-TOF MS spectra of HRP tryptic digest (1.0 pmol/μL)(A) by direct analysis, (B) after MIL-101(Cr)-N<sub>3</sub> enrichment and (C) after MIL-101(Cr)-maltose enrichment.

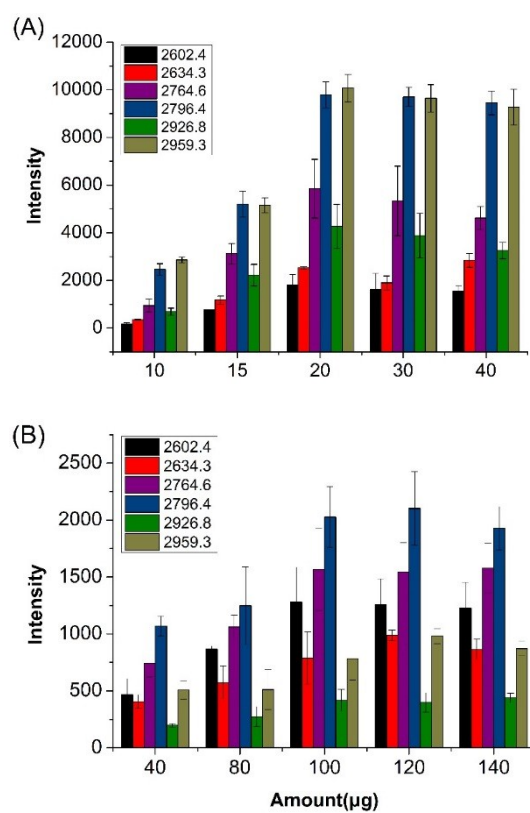

**Fig. S4** The intensity of six selected glycopeptides from 3 μg human IgG tryptic digest after enrichment by different amount of (A) MIL-101(Cr)-maltose and (B) MIL-101(Cr)-NH<sub>2</sub>.

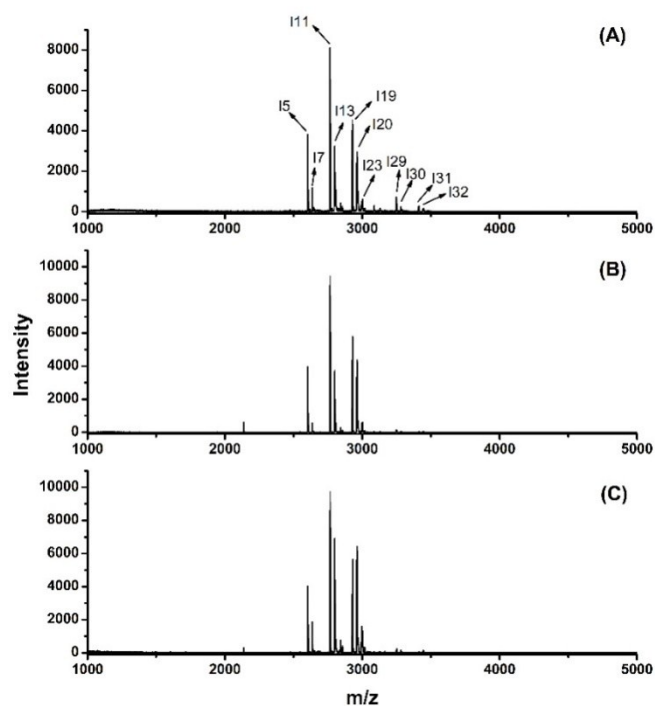

**Fig. S5** MALDI-TOF MS of glycopeptides enriched from human IgG digest (3 μg) using MIL-101(Cr)-maltose nanoparticles, (A) for the first time, (B) for the third time and (C) for the fifth time.

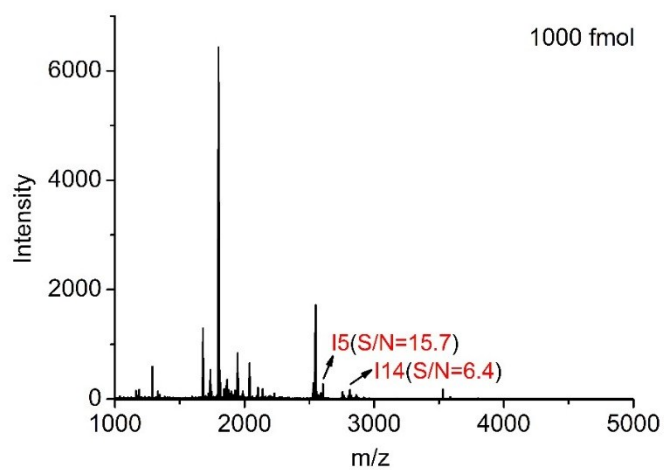

**Fig. S6** MALDI-TOF-MS spectra of IgG tryptic digest without enrichment 1000 fmol (0.5 μL).

**Table S1** Observed glycopeptides and glycan composition of HRP tryptic digests enriched by MIL-101(Cr)-maltose. N\* denotes the N-linked glycosylation sites.

| Peak number | Observed <i>m/z</i> | Glycan composition                                         | Peptide sequence                    |
|-------------|---------------------|------------------------------------------------------------|-------------------------------------|
| H1          | 1843.9              | [Hex]3[HexNAc]2[Fuc]1[Xyl]1                                | NVGLN*R                             |
| H2          | 2445.1              | [Hex]3[HexNAc]2 [Xyl]1                                     | PTLN*TTYLQTLR                       |
| H3          | 2531.1              | [HexNAc]1[Fuc]1                                            | SFAN*STQTFNFAFVEAMDR                |
| H4          | 2542.7              | [Hex]3[HexNAc]2[Fuc]1[Xyl]1                                | SSPN*ATDTIPLVR                      |
| H5          | 2590.2              | [Hex]3[HexNAc]2[Fuc]1[Xyl]1                                | PTLN*TTYLQTLR                       |
| H6          | 2613.9              | [Hex]3[HexNAc]2 [Xyl]1                                     | MGN*ITPLTGQTGGQIR                   |
| H7          | 3147.1              | [Hex]3[HexNAc]2[Fuc]1[Xyl]1                                | GLCPLNGN*LSALVDFDLR                 |
| H8          | 3190.3              | [HexNAc]1[Fuc]1                                            | LHFHDCFVNGCDASILLDN*TTSFR           |
| H9          | 3206.4              | [Hex]3[HexNAc]2 [Xyl]1                                     | SFAN*STQTFNFAFVEAMDR                |
| H10         | 3353.5              | [Hex]3[HexNAc]2[Fuc]1[Xyl]1                                | SFAN*STQTFNFAFVEAMDR                |
| H11         | 3386.7              | [Hex]6[HexNAc]4[Fuc]2[Xyl]1                                | DSFRNVGLN*R                         |
| H12         | 3674.4              | [Hex]3[HexNAc]2[Fuc]1[Xyl]1                                | GLIQSDQELFSSPN*ATDTIPLVR            |
| H13         | 4221.0              | [Hex]3[HexNAc]2[Fuc]1[Xyl]1                                | QLTPTFYDNSC(AAVESACPR)PN*V<br>SNIVR |
| H14         | 4840.7              | [Hex]3[HexNAc]2[Fuc]1[Xyl]1<br>[Hex]3[HexNAc]2 [Xyl]1      | LYN*FSNTGLPDPTLN*TTYLQTLR           |
| H15         | 4986.6              | [Hex]3[HexNAc]2[Fuc]1[Xyl]1<br>[Hex]3[HexNAc]2[Fuc]1[Xyl]1 | LYN*FSNTGLPDPTLN*TTYLQTLR           |

**Table S2** Observed glycopeptides and glycan composition of human IgG tryptic digests enriched by MIL-101(Cr)-maltose. N\* denotes the N-linked glycosylation sites.

| Peak number | Observed <i>m/z</i> | Glycan composition    | Peptide sequence |
|-------------|---------------------|-----------------------|------------------|
| I1          | 2400.1              | [Hex]3[HexNAc]3[Fuc]1 | EEQFN*STFR       |
| I2          | 2433.0              | [Hex]3[HexNAc]3[Fuc]1 | EEQYN*STYR       |
| I3          | 2490.1              | [Hex]3[HexNAc]4       | EEQYN*STYR       |
| I4          | 2562.3              | [Hex]4[HexNAc]3[Fuc]1 | EEQFN*STFR       |
| I5          | 2602.4              | [Hex]3[HexNAc]4[Fuc]1 | EEQFN*STFR       |
| I6          | 2618.2              | [Hex]4[HexNAc]4       | EEQFN*STFR       |
| I7          | 2634.3              | [Hex]3[HexNAc]4[Fuc]1 | EEQYN*STYR       |
| I8          | 2650.3              | [HexNAc]4[HexNAc]4    | EEQYN*STYR       |
| I9          | 2660.2              | [Hex]3[HexNAc]5       | EEQFN*STFR       |
| I10         | 2691.7              | [Hex]3[HexNAc]5       | EEQYN*STYR       |
| I11         | 2764.6              | [Hex]4[HexNAc]4[Fuc]1 | EEQFN*STFR       |
| I12         | 2780.6              | [Hex]5[HexNAc]4       | EEQFN*STFR       |
| I13         | 2796.4              | [Hex]4[HexNAc]4[Fuc]1 | EEQYN*STYR       |
| I14         | 2805.9              | [Hex]3[HexNAc]5[Fuc]1 | EEQFN*STFR       |
| I15         | 2812.7              | [Hex]5[HexNAc]4       | EEQYN*STYR       |

|     |        |                               |                |
|-----|--------|-------------------------------|----------------|
| I16 | 2822.6 | [Hex]4[HexNAc]5               | EEQFN*STFR     |
| I17 | 2838.3 | [Hex]3[HexNAc]5[Fuc]1         | EEQYN*STYR     |
| I18 | 2853.9 | [Hex]4[HexNAc]5               | EEQYN*STYR     |
| I19 | 2926.8 | [Hex]5[HexNAc]4[Fuc]1         | EEQFN*STFR     |
| I20 | 2959.3 | [Hex]5[HexNAc]4[Fuc]1         | EEQYN*STYR     |
| I21 | 2967.7 | [Hex]4[HexNAc]5 [Fuc]1        | EEQFN*STFR     |
| I22 | 2984.5 | [Hex]5[HexNAc]5               | EEQFN*STFR     |
| I23 | 2999.8 | [Hex]4[HexNAc]5 [Fuc]1        | EEQYN*STYR     |
| I24 | 3016.1 | [Hex]5[HexNAc]5               | EEQYN*STYR     |
| I25 | 3057.3 | [Hex]4[HexNAc]4[Fuc]1[NeuAc]1 | EEQFN*STFR     |
| I26 | 3085.3 | [Hex]4[HexNAc]4[Fuc]1[NeuAc]1 | EEQYN*STYR     |
| I27 | 3130.9 | [Hex]5[HexNAc]5[Fuc]1         | EEQFN*STFR     |
| I28 | 3162.6 | [Hex]5[HexNAc]5[Fuc]1         | EEQYN*STYR     |
| I29 | 3247.5 | [Hex]4[HexNAc]4[Fuc]1         | TKPREEQFN*STFR |
| I30 | 3279.6 | [Hex]4[HexNAc]4[Fuc]1         | TKPYEEQYN*STYR |
| I31 | 3409.6 | [Hex]5[HexNAc]4[Fuc]1         | TKPREEQFN*STFR |
| I32 | 3441.8 | [Hex]5[HexNAc]4[Fuc]1         | TKPYEEQYN*STYR |
| I33 | 3452.0 | [Hex]5[HexNAc]5[Fuc]1[NeuAc]1 | EEQYN*STYR     |

**Table S3** Observed glycopeptides of human serum tryptic digests without enrichment. OS=Organism Name, GN=Gene Name, PE=Protein Existence, SV=SequenceVersion. N\* denotes the N-linked glycosylation sites.

| Protein     | Description                                                                 | Peptide Sequence            |
|-------------|-----------------------------------------------------------------------------|-----------------------------|
| CERU_HUMAN  | Ceruloplasmin<br>OS=Homo sapiens<br>GN=CP PE=1 SV=1                         | DVDKEFYLFPTVFDEN*ESLLLEDNIR |
| WDR33_HUMAN | WD repeat-containing<br>protein 33 OS=Homo<br>sapiens GN=WDR33<br>PE=1 SV=2 | KTIDYN*PSVIK                |

**Table S4** Observed glycopeptides of human serum tryptic digests enriched by MIL-101(Cr)-maltose. OS=Organism Name, GN=Gene Name, PE=Protein Existence, SV=Sequence Version. N\* denotes the N-linked glycosylation sites.

| Protein    | Description                                               | Peptide Sequence                                           |
|------------|-----------------------------------------------------------|------------------------------------------------------------|
| A1AT_HUMAN | Alpha-1-antitrypsin OS=Homo sapiens GN=SERPINA1 PE=1 SV=3 | YLGN*ATAIFFLPDEGK<br>ADTHDEILEGLNFN*LTEIPEAQIHEGFQEL<br>LR |
| AACT_HUMAN | Alpha-1-antichymotrypsin OS=Homo sapiens                  | YTGN*ASALFILPDQDK<br>FN*LTETSEAEIHQSFQHLLR                 |

|                 |                                                               |                                                                                                                                                        |
|-----------------|---------------------------------------------------------------|--------------------------------------------------------------------------------------------------------------------------------------------------------|
|                 | GN=SERPINA3 PE=1 SV=2                                         |                                                                                                                                                        |
| A2MG_H<br>UMAN  | Alpha-2-macroglobulin OS=Homo sapiens GN=A2M PE=1 SV=2        | SLGNV <b>N</b> *FTVSAEALQSQELCGTEVPSVPE<br>HGR<br>GCVLLSYL <b>N</b> *ETVTVSASLESVR<br>V <b>S</b> <b>N</b> *QTL <del>S</del> LFFTVLQDVPVR               |
| A1AG1_H<br>UMAN | Alpha-1-acid glycoprotein 1 OS=Homo sapiens GN=ORM1 PE=1 SV=1 | E <b>N</b> *GTISR<br>QDQCIY <b>N</b> *TTYLNVQR<br>NEEY <b>N</b> *K                                                                                     |
| ANT3_H<br>UMAN  | Antithrombin-III OS=Homo sapiens GN=SERPINC1 PE=1 SV=1        | SLTF <b>N</b> *ETYQDISELVYGAK<br>WV <b>S</b> <b>N</b> *KTEGR<br>LGAC <b>N</b> *DTLQQLMEVFK<br>LGAC <b>N</b> *DTLQQLMEVFKFDTISEK                        |
| APOD_H<br>UMAN  | Apolipoprotein D OS=Homo sapiens GN=APOD PE=1 SV=1            | ADGTVNQIEGEATPV <b>N</b> *LTEPAK<br>ADGTVNQIEGEATPV <b>N</b> *LTEPAKLEVK                                                                               |
| APOB_H<br>UMAN  | Apolipoprotein B-100 OS=Homo sapiens GN=APOB PE=1 SV=1        | F <b>N</b> *SSYLQGTNQTGR<br>YDF <b>N</b> *SSMLYSTAK<br>FVEGSH <b>N</b> *STVSLTTK<br>VNQNLVYESGSL <b>N</b> *FSK                                         |
| APOC4_H<br>UMAN | Apolipoprotein C-IV OS=Homo sapiens GN=APOC4 PE=1 SV=1        | ELLETVV <b>N</b> *R                                                                                                                                    |
| A1AG2_H<br>UMAN | Alpha-1-acid glycoprotein 2 OS=Homo sapiens GN=ORM2 PE=1 SV=2 | QNQCFY <b>N</b> *SSYLVNQR                                                                                                                              |
| ATRN_H<br>UMAN  | Attractin OS=Homo sapiens GN=ATRN PE=1 SV=2                   | GIC <b>N</b> *SSDVR<br>IDSTG <b>N</b> *VTNELR                                                                                                          |
| APOH_H<br>UMAN  | Beta-2-glycoprotein 1 OS=Homo sapiens GN=APOH PE=1 SV=3       | VYKPSAG <b>N</b> *NSLYR<br>LG <b>N</b> *WSAMPSCK                                                                                                       |
| AFAM_H<br>UMAN  | Afamin OS=Homo sapiens GN=AFM PE=1 SV=1                       | YAEDKF <b>N</b> *ETTEK<br>DIENF <b>N</b> *STQK                                                                                                         |
| CERU_H<br>UMAN  | Ceruloplasmin OS=Homo sapiens GN=CP PE=1 SV=1                 | EHEGAITYPD <b>N</b> *TTDFQR<br>E <b>N</b> *LTAPGSDSAVFVEQGTTT<br>ELHHLQE <b>Q</b> <b>N</b> *VSNAFLDK<br>ELHHLQE <b>Q</b> <b>N</b> *VSNAFLDKGEFYIGSK    |
| CLUS_H<br>UMAN  | Clusterin OS=Homo sapiens GN=CLU PE=1 SV=1                    | H <b>N</b> *STGCLR<br>EDAL <b>N</b> *ETR<br>KEDAL <b>N</b> *ETR<br>KKEDAL <b>N</b> *ETR<br>LAN <b>N</b> *LTQGEDQYYLR<br>ML <b>N</b> *TSSLLEQLNEQFNWVSR |
| CO4A_H<br>UMAN  | Complement C4-A OS=Homo sapiens GN=C4A PE=1 SV=1              | GL <b>N</b> *VTLSSSTGR<br>FSDGLES <b>N</b> *SSTQFEVK                                                                                                   |
| CBG_HU          | Corticosteroid-binding globulin                               | AQLLQGLGF <b>N</b> *LTER                                                                                                                               |

|                 |                                                                      |                                                                                            |
|-----------------|----------------------------------------------------------------------|--------------------------------------------------------------------------------------------|
| MAN             | OS=Homo sapiens<br>GN=SERPINA6 PE=1 SV=1                             |                                                                                            |
| CO8A_H<br>UMAN  | Complement component C8 alpha chain OS=Homo sapiens GN=C8A PE=1 SV=2 | GGSSGWSGGLAQ <b>N</b> *R                                                                   |
| CO4B_H<br>UMAN  | Complement C4-B OS=Homo sapiens GN=C4B PE=1 SV=1                     | FSDGLES <b>N</b> *SSTQFEVK<br>GL <b>N</b> *VTLSSSTGR                                       |
| CO6_HU<br>MAN   | Complement component C6 OS=Homo sapiens GN=C6 PE=1 SV=3              | VL <b>N</b> *FTTK                                                                          |
| CO7_HU<br>MAN   | Complement component C7 OS=Homo sapiens GN=C7 PE=1 SV=2              | <b>N</b> *YTLTGR                                                                           |
| CO9_HU<br>MAN   | Complement component C9 OS=Homo sapiens GN=C9 PE=1 SV=2              | AV <b>N</b> *ITSENLIDDVVSLIR                                                               |
| CO3_HU<br>MAN   | Complement C3 OS=Homo sapiens GN=C3 PE=1 SV=2                        | TVLTPATNHMG <b>N</b> *VTFTIPANR                                                            |
| C1S_HU<br>MAN   | Complement C1s subcomponent OS=Homo sapiens GN=C1S PE=1 SV=1         | NCGV <b>N</b> *CSGDVFTALIGEIASPNYPKPYPE<br>NSR                                             |
| CFAI_HU<br>MAN  | Complement factor I OS=Homo sapiens GN=CFI PE=1 SV=1                 | FL <b>N</b> *GTCTAEGK                                                                      |
| C4BPA_H<br>UMAN | C4b-binding protein alpha chain OS=Homo sapiens GN=C4BPA PE=1 SV=2   | LSVDKDKQYVEPEN <b>N</b> *VTIQCDSGYGVVGPQ<br>SITCSG <b>N</b> *R                             |
| C4BPB_H<br>UMAN | C4b-binding protein beta chain OS=Homo sapiens GN=C4BPB PE=1 SV=1    | LGHCPDPVLVNGEFSSSGPV <b>N</b> *VSDK                                                        |
| CPN2_HU<br>MAN  | Carboxypeptidase N subunit 2 OS=Homo sapiens GN=CPN2 PE=1 SV=2       | AFGSNP <b>N</b> *LTK                                                                       |
| CHP1_HU<br>MAN  | Calcium-binding protein p22 OS=Homo sapiens GN=CHP PE=1 SV=3         | GE <b>N</b> *GTLSR                                                                         |
| CFAH_H<br>UMAN  | Complement factor H OS=Homo sapiens GN=CFH PE=1 SV=4                 | IPCSQPPQIEHGTIN <b>N</b> *SSR                                                              |
| FETUA_<br>HUMAN | Alpha-2-HS-glycoprotein OS=Homo sapiens GN=AHSG PE=1 SV=1            | VCQDCPLLAPL <b>N</b> *DTR<br>AALAAFNAQ <b>N</b> *GSNFQLEEISR<br>KVCQDCPLLAPL <b>N</b> *DTR |
| FHR1_HU<br>MAN  | Complement factor H-related protein 1 OS=Homo sapiens                | LQNNEN <b>N</b> *ISCVER                                                                    |

|             |                                                              |                                                                                                |
|-------------|--------------------------------------------------------------|------------------------------------------------------------------------------------------------|
|             | GN=CFHR1 PE=1 SV=2                                           |                                                                                                |
| FA10_HUMAN  | Coagulation factor X OS=Homo sapiens GN=F10 PE=1 SV=2        | GDNN*LTR                                                                                       |
| FINC_HUMAN  | Fibronectin OS=Homo sapiens GN=FN1 PE=1 SV=3                 | LDAPTNLQFVN*ETDSTVLVR<br>DQCIVDDITYNVN*DTFHK                                                   |
| HRG_HUMAN   | Histidine-rich glycoprotein OS=Homo sapiens GN=HRG PE=1 SV=1 | VIDFN*CTTSSVSSALANTK                                                                           |
| HPT_HUMAN   | Haptoglobin OS=Homo sapiens GN=HP PE=1 SV=1                  | NLFLN*HSEN*ATAK<br>VVLHPN*YSQVDIGLIK<br>MVSHHN*LTTGATLINEQWLLTTAK                              |
| HEMO_HUMAN  | Hemopexin OS=Homo sapiens GN=HPX PE=1 SV=2                   | SWPAVGN*CSSALR<br>ALPQPQN*VTSLLGCTH                                                            |
| HEP2_HUMAN  | Heparin cofactor 2 OS=Homo sapiens GN=SERPIND1 PE=1 SV=3     | DFVN*ASSK                                                                                      |
| IGHG1_HUMAN | Ig gamma-1 chain C region OS=Homo sapiens GN=IGHG1 PE=1 SV=1 | EEQYN*STYR                                                                                     |
| IGHG2_HUMAN | Ig gamma-2 chain C region OS=Homo sapiens GN=IGHG2 PE=1 SV=2 | EEQFN*STFR<br>TKPREEQFN*STFR                                                                   |
| IGHG3_HUMAN | Ig gamma-3 chain C region OS=Homo sapiens GN=IGHG3 PE=1 SV=2 | EEQYN*STFR                                                                                     |
| IGHG4_HUMAN | Ig gamma-4 chain C region OS=Homo sapiens GN=IGHG4 PE=1 SV=1 | EEQFN*STYR                                                                                     |
| IGHA1_HUMAN | Ig alpha-1 chain C region OS=Homo sapiens GN=IGHA1 PE=1 SV=2 | LSLHRPALEDLLLGSEAN*LTCTLTGLR                                                                   |
| IGHA2_HUMAN | Ig alpha-2 chain C region OS=Homo sapiens GN=IGHA2 PE=1 SV=3 | TPLTAN*ITK<br>LSLHRPALEDLLLGSEAN*LTCTLTGLR                                                     |
| IGHM_HUMAN  | Ig mu chain C region OS=Homo sapiens GN=IGHM PE=1 SV=3       | N*NSDISSTR<br>YKN*NSDISSTR<br>GLTFQQN*ASSMCVPDQDTAIR<br>THTN*ISESHPN*ATFSAVGEASICEDDWNS<br>GER |
| IGJ_HUMAN   | Immunoglobulin J chain OS=Homo sapiens GN=IGJ PE=1 SV=4      | EN*ISDPTSPLR                                                                                   |
| IC1_HUMAN   | Plasma protease C1 inhibitor OS=Homo sapiens                 | DTFVN*ASR<br>VLSN*NSDANLELINTWVAK                                                              |

|                 |                                                                                    |                                                    |
|-----------------|------------------------------------------------------------------------------------|----------------------------------------------------|
|                 | GN=SERPING1 PE=1 SV=2                                                              |                                                    |
| ITIH3_H<br>UMAN | Inter-alpha-trypsin inhibitor heavy chain H3 OS=Homo sapiens<br>GN=ITIH3 PE=1 SV=2 | NAHGEEKEN*LTAR                                     |
| ITIH4_H<br>UMAN | Inter-alpha-trypsin inhibitor heavy chain H4 OS=Homo sapiens<br>GN=ITIH4 PE=1 SV=4 | DQFNLI VFSTEATQWRPSLVPASAENV*K                     |
| KV203_H<br>UMAN | Ig kappa chain V-II region MIL OS=Homo sapiens PE=1 SV=1                           | FSGSGSGTN*FTLK                                     |
| KLKB1_<br>HUMAN | Plasma kallikrein OS=Homo sapiens<br>GN=KLKB1 PE=1 SV=1                            | IYSGILN*LSDITK<br>GVNFN*VSK<br>IYPGVDFGGEELN*VTFVK |
| KNG1_H<br>UMAN  | Kininogen-1 OS=Homo sapiens<br>GN=KNG1 PE=1 SV=2                                   | YNSQN*QSNNQFVLYR<br>LNAENN*ATFYFK                  |
| LG3BP_H<br>UMAN | Galectin-3-binding protein OS=Homo sapiens<br>GN=LGALS3BP PE=1 SV=1                | ALGFEN*ATQALGR                                     |
| LUM_HU<br>MAN   | Lumican OS=Homo sapiens<br>GN=LUM PE=1 SV=2                                        | LHINHNN*LTESVGPLPK<br>AFENN*VTDLQWLILDHNLLNSK      |
| LV202_H<br>UMAN | Ig lambda chain V-II region NEI OS=Homo sapiens PE=1 SV=1                          | RPSGVSN*R                                          |
| PEDF_HU<br>MAN  | Pigment epithelium-derived factor OS=Homo sapiens<br>GN=SERPINF1 PE=1 SV=3         | VTQN*LTIEESLTSEFIHDIDR                             |
| PON1_H<br>UMAN  | Serum paraoxonase/arylesterase 1 OS=Homo sapiens<br>GN=PON1 PE=1 SV=2              | HAN*WTLTPLK<br>VTQVYAENN*GTVLQGSTVASVYK            |
| PLTP_HU<br>MAN  | Phospholipid transfer protein OS=Homo sapiens<br>GN=PLTP PE=1 SV=1                 | VSN*VSCQASVSR                                      |
| TRFE_HU<br>MAN  | Serotransferrin OS=Homo sapiens<br>GN=TF PE=1 SV=2                                 | CGLVPVLAENYN*K<br>QQQH LFGSN*VTDCSGNFCLFR          |
| THRB_H<br>UMAN  | Prothrombin OS=Homo sapiens<br>GN=F2 PE=1 SV=2                                     | N*FTENDLLVR<br>GHVN*ITR                            |
| TNPO3_H<br>UMAN | Transportin-3 OS=Homo sapiens<br>GN=TNPO3 PE=1 SV=3                                | DAN*CSVMR                                          |
| TTHY_H<br>UMAN  | Transthyretin OS=Homo sapiens<br>GN=TTR PE=1 SV=1                                  | ALGISPFHEHAEVVFTAN*DSGPR                           |
| WDR33_<br>HUMAN | WD repeat-containing protein 33 OS=Homo sapiens<br>GN=WDR33 PE=1 SV=2              | KTIDYN*PSVIK                                       |
| VTNC_H<br>UMAN  | Vitronectin OS=Homo sapiens<br>GN=VTN PE=1 SV=1                                    | NN*ATVHEQVGGPSLTSDLQAQSK                           |

|                 |                                                                    |                                    |
|-----------------|--------------------------------------------------------------------|------------------------------------|
| ZA2G_H<br>UMAN  | Zinc-alpha-2-glycoprotein<br>OS=Homo sapiens GN=AZGP1<br>PE=1 SV=1 | FGCEIENN*R<br>DIVEYYN*DSN*GSHVLQGR |
| ZN750_H<br>UMAN | Protein ZNF750 OS=Homo<br>sapiens GN=ZNF750 PE=2 SV=1              | LN*PSDPNR                          |
